# Supplementary material for: The sensitivity of EC-Earth3 decadal predictions to the choice of volcanic forcing dataset: insights for the next major eruption
Source: Copernicus journal article supplement (doi:10.5194/gmd-18-6239-2025), 2025-09-23
Supplement: Supplementary file 1 [file gmd-18-6239-2025-supplement.pdf]

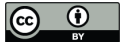

*Supplement of*

## **The sensitivity of EC-Earth3 decadal predictions to the choice of volcanic forcing dataset: insights for the next major eruption**

**Roberto Bilbao et al.**

*Correspondence to:* Roberto Bilbao ([roberto.bilbao@bsc.es](mailto:roberto.bilbao@bsc.es))

The copyright of individual parts of the supplement might differ from the article licence.

| Volcano name | Eruption year | Eruption month | Eruption day | Latitude (degree north) | Mass of SO <sub>2</sub> (kt of SO <sub>2</sub> ) | Hemispheric asymmetry of aerosol spread (NH/SH) |
|--------------|---------------|----------------|--------------|-------------------------|--------------------------------------------------|-------------------------------------------------|
| Agung        | 1963          | 3              | 17           | -8                      | 10440                                            | 0.19                                            |
| El_Chichon   | 1982          | 3              | 29           | 17.2                    | 7000                                             | 1.5                                             |
| Pinatubo     | 1991          | 6              | 15           | 15                      | 18000                                            | -1                                              |

**Table S1:** List of eruption parameters (Toohey et al., 2016) used to create the EVA forcing.

| Volcano name | Eruption year | Eruption month | Eruption day | Latitude (degree north) | Longitude (Degree east) | Mass of SO <sub>2</sub> (kt of SO <sub>2</sub> ) | Tropopause altitude at volcano location (km a.s.l.) | Altitude of SO <sub>2</sub> emission (km a.s.l.) |
|--------------|---------------|----------------|--------------|-------------------------|-------------------------|--------------------------------------------------|-----------------------------------------------------|--------------------------------------------------|
| Agung        | 1963          | 3              | 17           | -8.34                   | 115.58                  | 9400                                             | 16.56                                               | 20                                               |
| Agung        | 1963          | 5              | 16           | -8.34                   | 115.58                  | 4600                                             | 16.56                                               | 18                                               |
| El_Chichon   | 1982          | 3              | 29           | 17.36                   | -93.228                 | 750                                              | 16.25                                               | 17                                               |
| El_Chichon   | 1982          | 4              | 3            | 17.36                   | -93.228                 | 340                                              | 16.25                                               | 17                                               |
| El_Chichon   | 1982          | 4              | 4            | 17.36                   | -93.228                 | 7000                                             | 16.25                                               | 28                                               |
| Pinatubo     | 1991          | 6              | 13           | 15.13                   | 120.35                  | 140                                              | 16.51                                               | 19                                               |
| Pinatubo     | 1991          | 6              | 14           | 15.13                   | 120.35                  | 54                                               | 16.51                                               | 25                                               |
| Pinatubo     | 1991          | 6              | 15           | 15.13                   | 120.35                  | 18000                                            | 16.51                                               | 25                                               |
| Hudson       | 1991          | 8              | 9            | -45.9                   | -72.97                  | 700                                              | 96.76                                               | 12                                               |
| Hudson       | 1991          | 8              | 12           | -45.9                   | -72.97                  | 600                                              | 96.76                                               | 16                                               |
| Hudson       | 1991          | 8              | 15           | -45.9                   | -72.97                  | 2700                                             | 96.76                                               | 18                                               |

**Table S2:** List of eruption parameters (Carn et al., 2016) used to create the EVA\_H forcing.

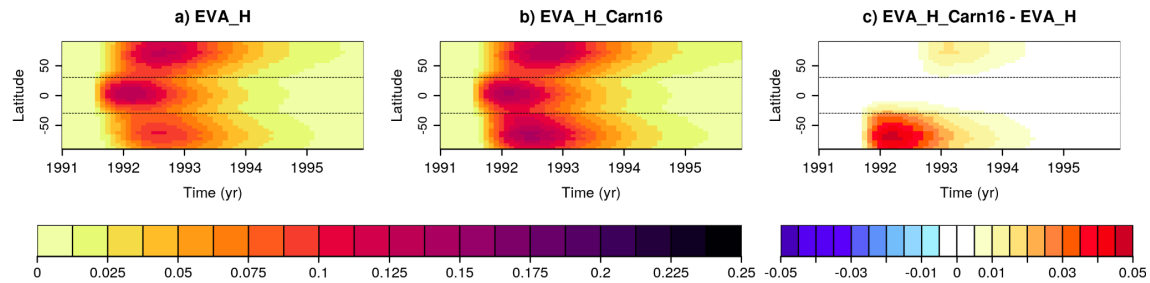

**Figure S1:** Stratospheric aerosol optical depth at 530 nm as a function of time and latitude for the eruption of Mount Pinatubo in 1991 for (a) EVA\_H, (b) EVA\_H\_Carn16 and their difference.

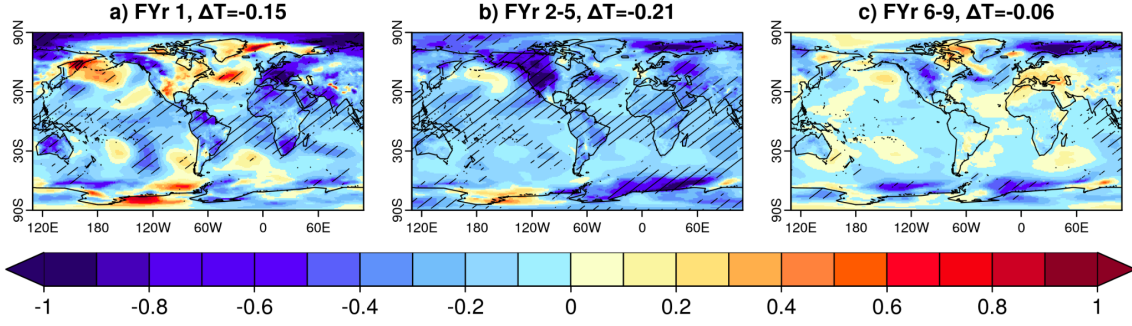

Figure S2: Ensemble mean surface air temperature ( $^{\circ}\text{C}$ ) response (volc - no volc) following the eruption of Pinatubo (June-May) in DCPPEVA\_H-Hud for (a) forecast year 1, (b) forecast years 2-5 and (c) forecast years 6-9. Hatching indicates statistically significant anomalies according to a bootstrap with resampling with 1000 iterations. The titles include the global mean surface temperature response.

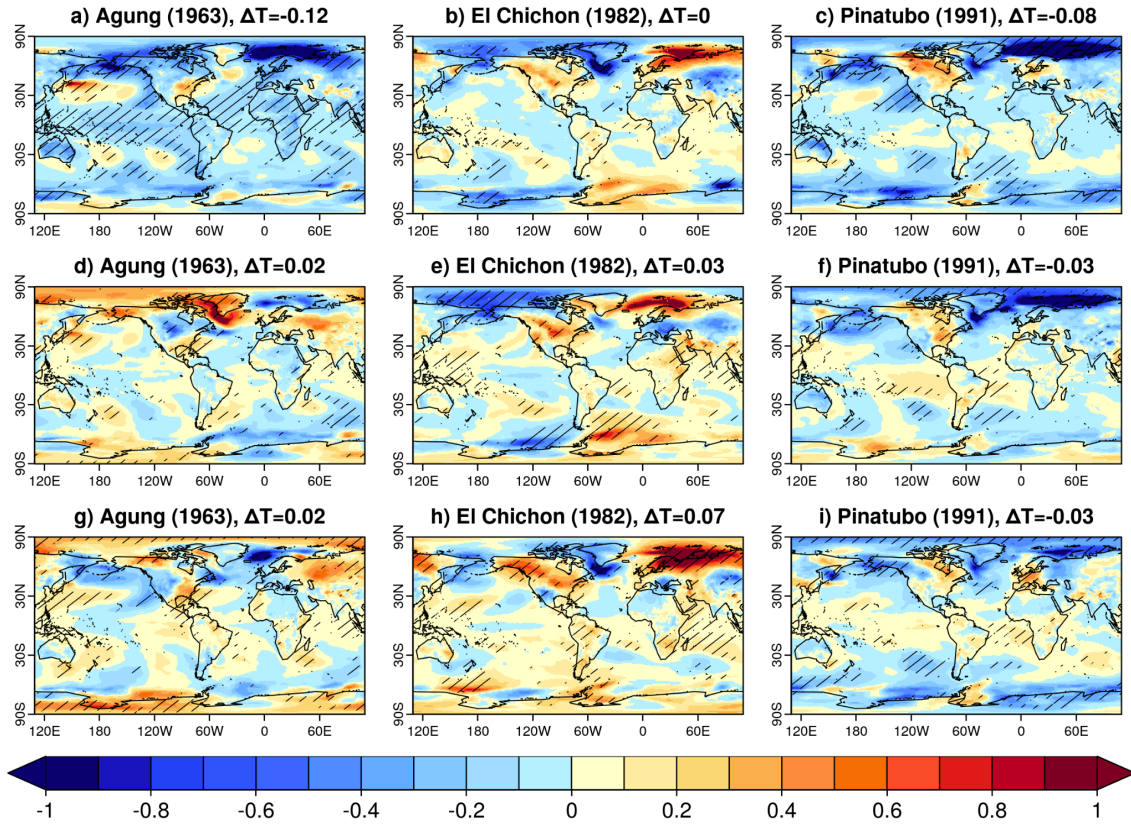

Figure S3: Ensemble mean surface air temperature ( $^{\circ}\text{C}$ ) response (volc - no volc) for years 6-9 following the eruptions (June-May) in DCPPEVA\_H-Hud for (a) forecast year 1, (b) forecast years 2-5 and (c) forecast years 6-9. Hatching indicates statistically significant anomalies according to a bootstrap with resampling with 1000 iterations. The titles include the global mean surface temperature response.

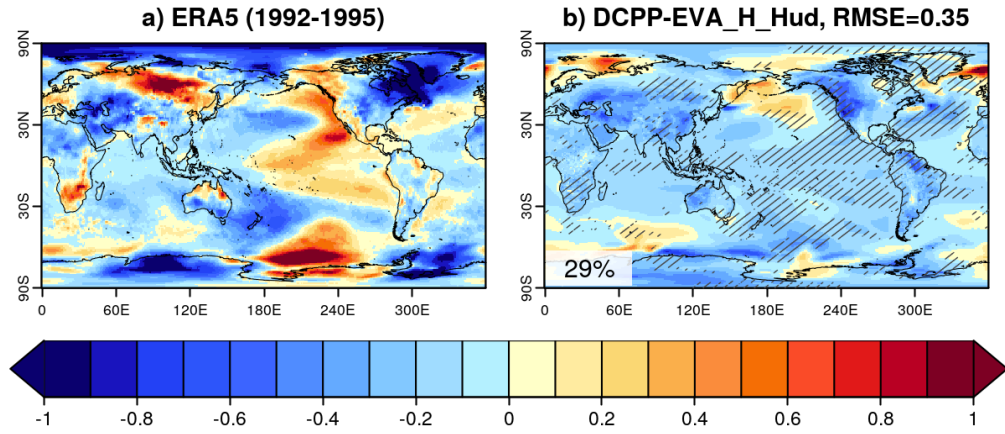

Figure S4: Surface air temperature anomalies ( $^{\circ}\text{C}$ ) for forecast years 2-5 following the eruptions (years are defined from Jan-Dec) in ERA5 and for the predicted ensemble mean initialised in 1990 for the DCPPEVA\_H-Hud hindcasts. The anomalies have been computed with respect to the period 1971-2015 (see methods). Stippling indicates where the observations fall outside of the 90% range of the ensemble and the percentage at the bottom left corner of each map indicates the percentage of global area outside this range.
